# Supplementary material
Source: ML conference proceedings conference paper supplement (https://openreview.net/forum?id=8ox2vrQiTF)
Supplement: supplementary_material [file attachment]

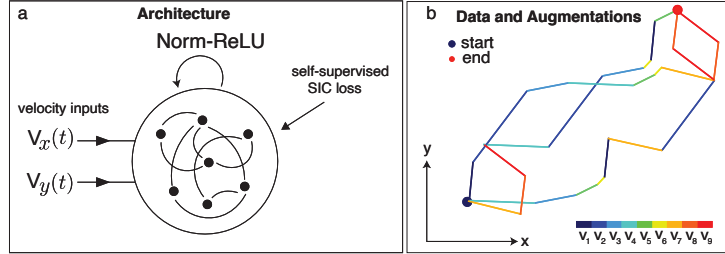

Figure 8: **A trained recurrent neural network learns multiple modules of grid cells.** (a) The architecture of the recurrent neural network used. Inputs are 2D Cartesian velocities  $\mathbf{v}_t \in \mathbb{R}^2$  and the non-linearity is Norm-ReLU. No positional readout exists. (b) Input trajectory velocities are drawn i.i.d. from a uniform distribution, then randomly permuted to create a batch; 3 trajectories shown.

## 417 A Experimental Details

### 418 Architecture and training data + augmentations

419 Our code was implemented in PyTorch [39] and PyTorch Lightning [18]. Hyperparameters for our  
 420 experiments are listed in Table 1. Our code will be made publicly available upon publication.

| Hyperparameters                             | Values                                                                             |
|---------------------------------------------|------------------------------------------------------------------------------------|
| Batch size                                  | 130                                                                                |
| Trajectory length                           | 60                                                                                 |
| Velocity sampling distribution              | $\mathbf{v}_t \in \mathbb{R}^2 \sim_{i.i.d.} \text{Uniform}^2(-0.15, 0.15)$ meters |
| RNN nonlinearity                            | $\text{Norm}(\text{ReLU}(\cdot))$                                                  |
| Number of RNN units                         | 128                                                                                |
| Number of MLP layers                        | 3                                                                                  |
| Spatial length scale $\sigma_x$             | 0.05 meters                                                                        |
| Neural length scale $\sigma_g$              | 0.4                                                                                |
| Separation loss coefficient $\lambda_{Sep}$ | 1.0                                                                                |
| Invariance loss coefficient $\lambda_{Inv}$ | 0.1                                                                                |
| Capacity loss coefficient $\lambda_{Cap}$   | 0.5                                                                                |
| Optimizer                                   | AdamW [32]                                                                         |
| Optimizer scheduler                         | Reduce Learning Rate on Plateau                                                    |
| Learning rate                               | 2e-5                                                                               |
| Gradient clip value                         | 0.1                                                                                |
| Weight decay                                | None                                                                               |
| Accumulate gradient batches                 | 2                                                                                  |
| Number of gradient descent steps            | 2e6                                                                                |

Table 1: Hyperparameters used for training the networks.

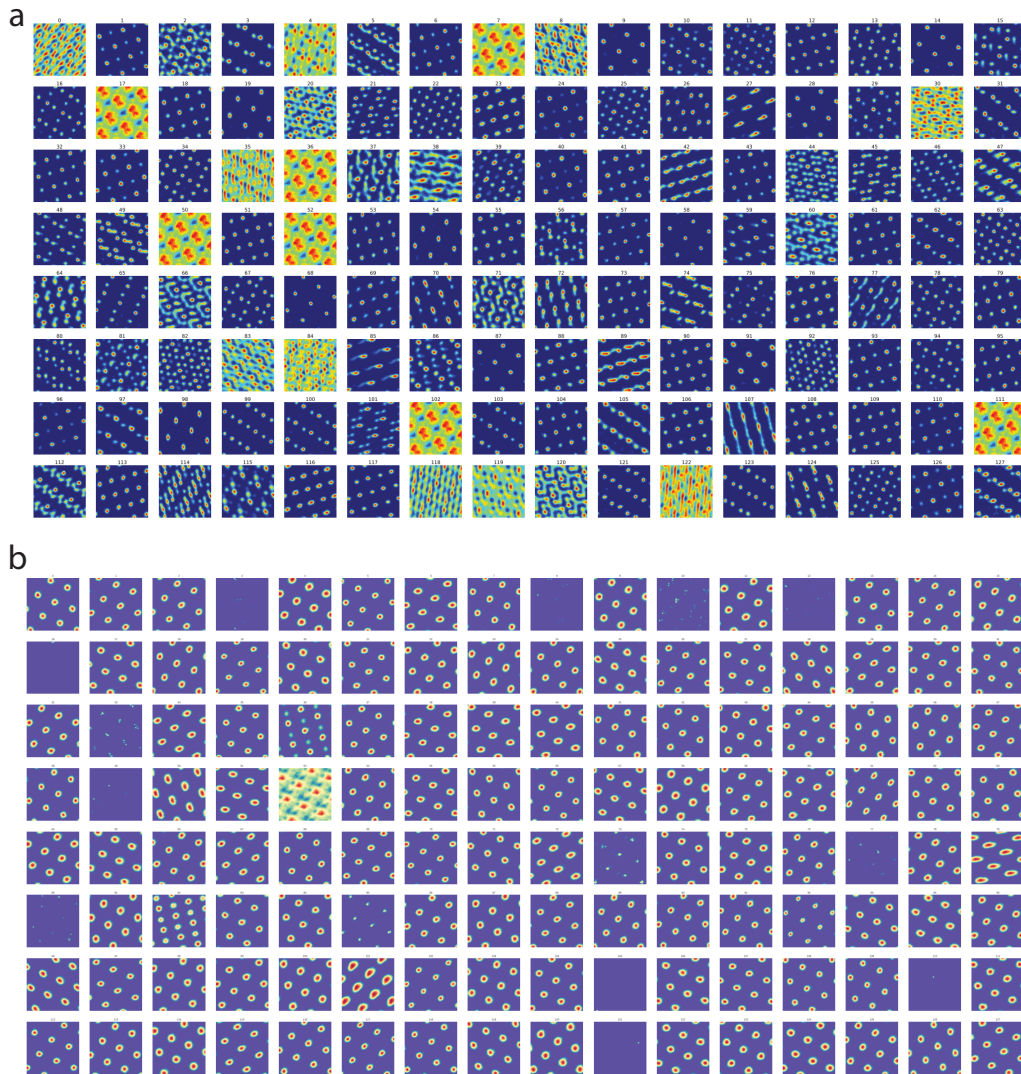

Figure 9: All 128 ratemaps evaluated on trajectories inside a 2m box. (a) Ratemaps from the corresponding to Fig. 4 (b) Ratemaps corresponding to the run in Fig.6

421 **B All Ratemaps**

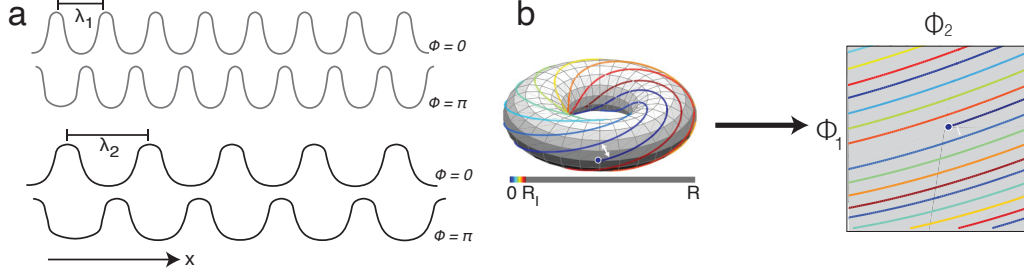

Figure 10: (a) 2 Example cells from 2 modules, with preferred phase 0 and  $\pi$ . (b) Visualizing the state space defined by  $\{\phi^1, \phi^2\}$  as a torus (left) and on a square with periodic boundary conditions (right), which an equivalent construction of a torus.

## 422 C Construction of the grid code

423 To explain the structure of the grid code, we consider idealized tuning curves in 1d.

424 Each cell  $i$  is defined by its periodicity  $\lambda^\alpha \in \mathcal{R}$  and preferred phase  $\phi_i \in S^1$ . All cells in the same  
 425 module  $\alpha$  have the same periodicity and uniformly tile all allowed phases. For position  $x \in \mathcal{R}$ ,

$$r_i^\alpha(x) = R_{\max} \text{ReLU} \left[ \cos \left( \frac{2\pi}{\lambda_\alpha} x + \phi_i \right) \right] \quad (11)$$

426 The tuning curves corresponding to this module can be seen in Fig. 10a.

427 For this module, we can define  $\phi^\alpha(x) = \frac{2\pi}{\lambda_\alpha} x$  modulo  $2\pi$ . Here  $\phi^\alpha \in S^1$ .

428 So the firing rate can now be written as

$$r_i^\alpha(x) = R_{\max} \text{ReLU} [\cos (\phi^\alpha(x) + \phi_i)] \quad (12)$$

429 All information about the current state of the module is encoded in the single variable  $\phi^\alpha$ . Thus the  
 430 set of phases  $\{\phi^\alpha\}_\alpha \in S^1 \times \dots \times S^1$  uniquely define the coding states of the set of grid modules.

431 For 2 modules, defined by  $\{\phi^1, \phi^2\}$ , these states can be visualized as being on a torus  $S^1 \times S^1$ ,  
 432 Fig.10b.
